# Supplementary material for: Associations Between Blood Pressure and Accelerated DNA Methylation Aging
Source: PubMed Central journal article supplement — J Am Heart Assoc. 2022 Jan 8;11(3):e022257. doi: 10.1161/JAHA.121.022257 (PMC9238504; doi:10.1161/jaha.121.022257), 2022-01-08
Supplement: JAH3-11-e022257-s001.pdf [file JAH3-11-e022257-s001.pdf]

# **Supplemental Material**

Table S1. Differences of general characteristics between hypertensive and non-hypertensive participants (N=280).

| Characteristics                                  | Hypertension<br>(n=147) | Non-hypertension<br>(n=133) | P value |
|--------------------------------------------------|-------------------------|-----------------------------|---------|
| Sex, Female, n (%)                               | 89 (60.5)               | 71 (53.4)                   | 0.276   |
| Chronological age (years,<br>mean $\pm$ SD)      | 81.3 $\pm$ 16.2         | 75.5 $\pm$ 16.1             | 0.003   |
| DNAm age (years, mean $\pm$ SD)                  | 79.9 $\pm$ 12.4         | 74.2 $\pm$ 9.96             | <0.001  |
| $\Delta$ Age <sup>†</sup> (years, mean $\pm$ SD) | -2.54 $\pm$ 0.61        | -3.83 $\pm$ 0.56            | <0.001  |
| Aging rate*(mean $\pm$ SD)                       | 0.965 $\pm$ 0.10        | 0.931 $\pm$ 0.09            | 0.001   |
| BMI (kg/m <sup>2</sup> , mean $\pm$ SD)          | 22.3 $\pm$ 4.15         | 21.5 $\pm$ 3.06             | 0.057   |
| Socioeconomic status, n (%)                      |                         |                             |         |
| Lower                                            | 56 (38.1)               | 54 (40.6)                   | 0.690   |
| Middle                                           | 49 (33.3)               | 38 (28.6)                   |         |
| Higher                                           | 42 (28.6)               | 41 (30.8)                   |         |
| Cigarette smoking, n (%)                         | 19 (12.9)               | 17 (12.8)                   | 0.990   |
| Alcohol drinking, n (%)                          | 42 (28.6)               | 25 (18.8)                   | 0.080   |
| Sleep duration (hours, mean $\pm$<br>SD)         | 9.76 $\pm$ 1.68         | 9.46 $\pm$ 1.54             | 0.121   |
| Physical activity, n (%)                         | 70 (47.6)               | 60 (45.1)                   | 0.764   |
| Diabetes, n (%)                                  | 13 (8.8)                | 10 (7.5)                    | 0.853   |
| Hyperlipidemia, n (%)                            | 62 (42.2)               | 39 (29.3)                   | 0.035   |

Abbreviations: BMI, body mass index; SD, standard deviance; DNAm age, DNA methylation age. † $\Delta$ Age was calculated as residual from regressing DNAm on chronological age. \*Aging rate was calculated as the methylation age divided by chronological age. Data are presented as n (%) for categorical variables, and mean  $\pm$  SD for continuous variables.

Table S2. Univariate analysis of related factors with epigenetic age acceleration (N=280).

| Factors                        | $\beta$ (95% CI) of $\Delta$ Age | P value | $\beta$ (95% CI) of aging rate | P value |
|--------------------------------|----------------------------------|---------|--------------------------------|---------|
| Sex (Female vs. Male)          | 2.08 (0.65, 3.51)                | <0.001  | 0.016 (0.005, 0.027)           | <0.001  |
| BMI (kg/m <sup>2</sup> )       | 0.492(0.161, 0.823)              | 0.004   | 0.007(0.002, 0.011)            | 0.003   |
| Socioeconomic status           |                                  |         |                                |         |
| Middle vs. Lower               | -3.95(-6.84, -1.06)              | 0.008   | -0.052(-0.088, -0.016)         | 0.005   |
| Upper vs. Lower                | -6.00 (-8.92, -3.07)             | <0.001  | -0.078(-0.115, -0.042)         | <0.001  |
| Cigarette smoking (yes vs. no) | 4.57(0.916, 8.23)                | 0.015   | 0.071(0.023, 0.12)             | 0.004   |
| Alcohol drinking (yes vs. no)  | 1.36(-1.54, 4.26)                | 0.358   | 0.024(-0.015, 0.062)           | 0.234   |
| Sleep (hours)                  | -2.80 (-3.49, -2.11)             | <0.001  | -0.039(-0.048, -0.03)          | <0.001  |
| Physical activity (yes vs. no) | -2.36 (-4.56, -0.164)            | 0.010   | 0.046(0.016, 0.076)            | <0.001  |
| Diabetes (yes vs. no)          | 2.99 (-1.51, 7.48)               | 0.194   | 0.038(-0.022, 0.098)           | 0.213   |
| Hyperlipidemia (yes vs. no)    | 1.01(-1.56, 3.59)                | 0.442   | 0.009(-0.024, 0.041)           | 0.603   |

Abbreviations: BMI, body mass index.  $\Delta$ Age was calculated as residual from regressing DNAm on chronological age. Aging rate was calculated as the methylation age divided by chronological age.

Table S3. Sensitivity analysis for associations of blood pressure with epigenetic age acceleration in participants without taking antihypertensive medications (n=241)

| Variables | Estimated changes of $\Delta$ Age (years) per 10 |          | Estimated changes of ageing rate per 10 |          |
|-----------|--------------------------------------------------|----------|-----------------------------------------|----------|
|           | mmHg increase in blood pressure                  |          | mmHg increase in blood pressure         |          |
|           | $\beta$ (95%CI)                                  | <i>P</i> | $\beta$ (95%CI)                         | <i>P</i> |
| SBP       | 0.613 (0.019, 1.21)                              | 0.045    | 0.009(0.001, 0.017)                     | 0.033    |
| DBP       | -0.17(-1.14, 0.80)                               | 0.731    | -0.002(-0.015, 0.011)                   | 0.769    |
| PP        | 0.973 (0.27, 1.68)                               | 0.008    | 0.012(0.003, 0.022)                     | 0.012    |
| MAP       | 0.37(-0.542, 1.28)                               | 0.428    | 0.005(-0.007, 0.017)                    | 0.440    |

Abbreviations: SBP, systolic blood pressure; DBP, diastolic blood pressure; PP, pulse pressure; MAP, mean arterial pressure;  $\beta$ , regression coefficients; CI, confidence interval.  $\Delta$ Age was calculated as residual from regressing DNAm age on chronological age. Ageing rate was calculated as DNAm age divided by chronological age. The  $\beta$  was estimated with adjustment for sex, BMI, socioeconomic status, cigarette smoking, alcohol drinking, physical activity, sleep duration, hyperlipidemia, and diabetes

Table S4. Sensitivity analysis for associations between blood pressure and epigenetic age acceleration based on Hannum's clock (n=280)

| Variables    | Estimated changes in $\Delta$ Age (years) by tertiles of blood pressure parameters |                       |                      | Per 10 mmHg increase<br>in blood pressure | <i>P</i> value for<br>trend |
|--------------|------------------------------------------------------------------------------------|-----------------------|----------------------|-------------------------------------------|-----------------------------|
|              | T1 $\beta$ (95%CI)                                                                 | T2 $\beta$ (95%CI)    | T3 $\beta$ (95%CI)   |                                           |                             |
| SBP          | $\leq 129$ mmHg                                                                    | 129 to 147 mmHg       | $>147$ mmHg          |                                           |                             |
| $\Delta$ Age | 0(referent)                                                                        | 1.298(-1.179, 3.775)  | 4.021(1.598, 6.445)  | 0.682(0.281, 1.083)                       | 0.001                       |
| Ageing rate  | 0(referent)                                                                        | 0.014(-0.02, 0.049)   | 0.052(0.018, 0.085)  | 0.009(0.003, 0.014)                       | 0.003                       |
| DBP          | $\leq 74$ mmHg                                                                     | 74 to 83 mmHg         | $>83$ mmHg           |                                           |                             |
| $\Delta$ Age | 0(referent)                                                                        | -0.172(-2.711, 2.367) | 0.001(-2.546, 2.548) | -0.029(-0.799, 0.741)                     | 0.993                       |
| Ageing rate  | 0(referent)                                                                        | -0.001(-0.036, 0.034) | 0.001(-0.034, 0.035) | -0.001(-0.01, 0.011)                      | 0.966                       |
| PP           | $\leq 53$ mmHg                                                                     | 53 to 66 mmHg         | $>66$ mmHg           |                                           |                             |
| $\Delta$ Age | 0(referent)                                                                        | 1.283(-1.138, 3.705)  | 4.864(2.472, 7.256)  | 1.221(0.696, 1.745)                       | $<0.001$                    |
| Ageing rate  | 0(referent)                                                                        | 0.011(-0.022, 0.045)  | 0.061(0.028, 0.094)  | 0.016(0.008, 0.023)                       | $<0.001$                    |
| MAP          | $\leq 93$ mmHg                                                                     | 93 to 105 mmHg        | $>105$ mmHg          |                                           |                             |
| $\Delta$ Age | 0(referent)                                                                        | 0.335(-2.215, 2.886)  | 2.464(-0.082, 5.009) | 0.561(-0.086, 1.207)                      | 0.054                       |

---

|             |             |                     |                      |                      |       |
|-------------|-------------|---------------------|----------------------|----------------------|-------|
| Ageing rate | 0(referent) | 0.006(-0.03, 0.041) | 0.031(-0.004, 0.066) | 0.008(-0.001, 0.016) | 0.075 |
|-------------|-------------|---------------------|----------------------|----------------------|-------|

---

Abbreviations: SBP, systolic blood pressure; DBP, diastolic blood pressure; PP, pulse pressure; MAP, mean arterial pressure;  $\beta$ , regression coefficients; CI, confidence interval.  $\Delta$ Age was calculated as residual from regressing DNAm age on chronological age. Ageing rate was calculated as DNAm age divided by chronological age. All models were adjusted for sex, BMI, socioeconomic status, cigarette smoking, alcohol drinking, physical activity, sleep duration, hyperlipidemia, and diabetes.

Table S5. The associations of hypertension with epigenetic age acceleration (N=280).

| Models                          | $\beta$ (95% CI) of $\Delta$ Age | $\beta$ (95% CI) of aging rate |
|---------------------------------|----------------------------------|--------------------------------|
| Crude model for hypertension    |                                  |                                |
| No                              | 0 (referent)                     | 0 (referent)                   |
| Yes                             | 3.96 (1.53, 6.40)                | 0.051(0.02-0.082)              |
| P value                         | 0.002                            | 0.001                          |
| Adjusted model for hypertension |                                  |                                |
| No                              | 0 (referent)                     | 0 (referent)                   |
| Yes                             | 3.10 (1.07-5.13)                 | 0.04(0.015-0.065)              |
| P value                         | 0.003                            | 0.002                          |

Abbreviations:  $\Delta$ Age was calculated as residual from regressing DNAm on chronological age. Aging rate was calculated as the methylation age divided by chronological age. Adjusted models were adjusted for sex, BMI, socioeconomic status, cigarette smoking, alcohol drinking, physical activity, sleep duration, hyperlipidemia, and diabetes.



Table S6. Summary of EWAS-derived differentially methylated region analysis in relation to hypertension (N=280).

| DMR location (hg 19)     | No.<br>(CpGs) | Mean effect* | P     | Nearest gene |
|--------------------------|---------------|--------------|-------|--------------|
| chr1:203320223-203320732 | 10            | 0.255        | 0.004 | FMOD         |
| chr1:55267046-55267293   | 8             | -0.205       | 0.019 | TTC22        |
| chr2:37423361-37424104   | 11            | -0.187       | 0.009 | CEBPZOS      |
| chr4:57547347-57548290   | 9             | 0.222        | 0.009 | HOPX         |
| chr5:68628240-68628856   | 8             | -0.211       | 0.016 | CCDC125      |
| chr5:135416029-135416613 | 9             | -0.18        | 0.023 | MIR886       |
| chr6:32551749-32552453   | 10            | -0.24        | 0.005 | HLA-DRB1     |
| chr6:31650735-31651070   | 11            | 0.161        | 0.014 | -            |
| chr7:27183133-27183990   | 16            | 0.186        | 0.002 | HOXA5        |
| chr10:81967195-81967666  | 7             | 0.255        | 0.007 | LINC00857    |
| chr12:75784855-75785295  | 9             | -0.19        | 0.018 | GLIPR1L2     |

\*Mean effect was estimated from limma models of Beta-values. P values were false discovery rate (FDR) values.

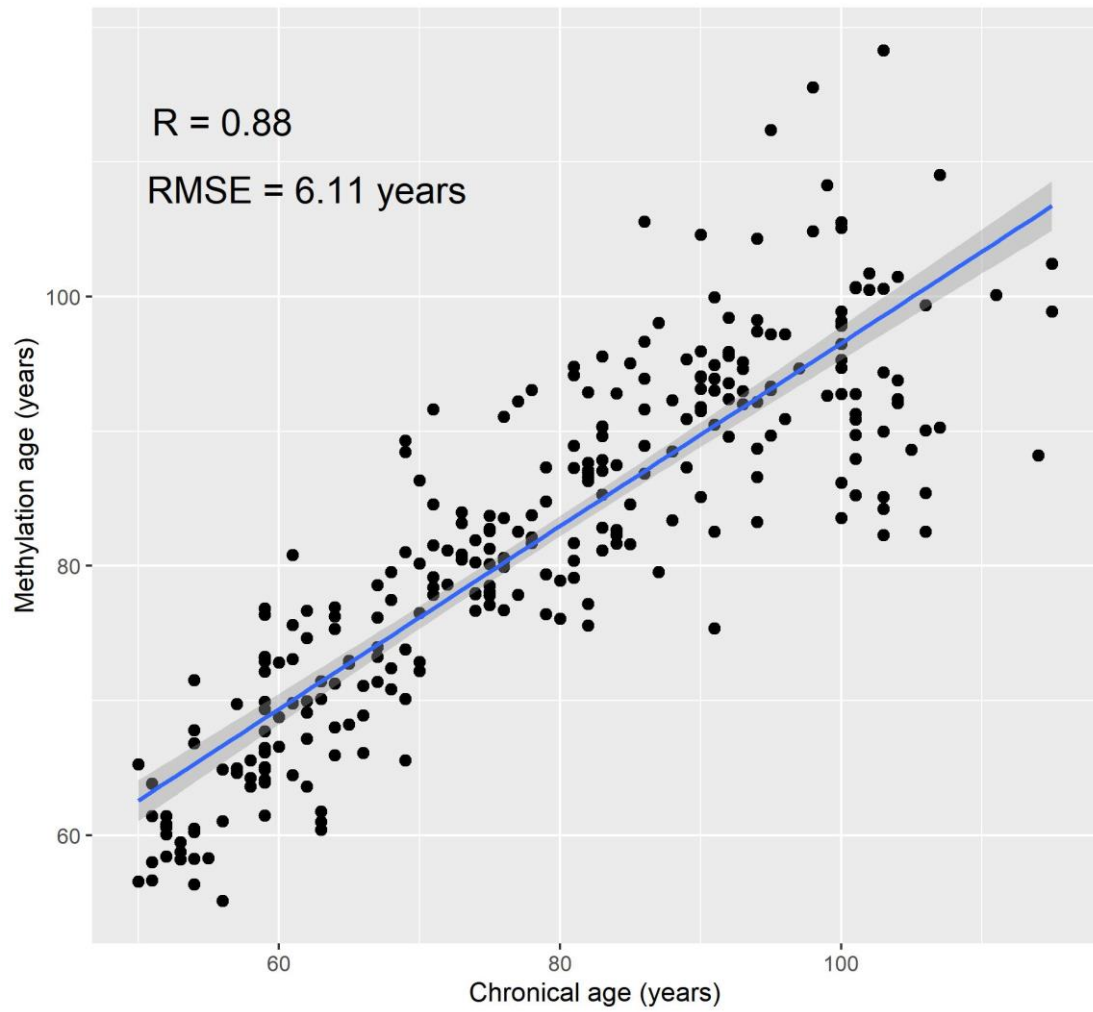

Figure S1. Scatter plot for the correlation between chronological age and Horvath's DNAm age in the elder study population (N=280). R denotes the Pearson's correlation coefficients. RMSE denotes the root-mean-square error.

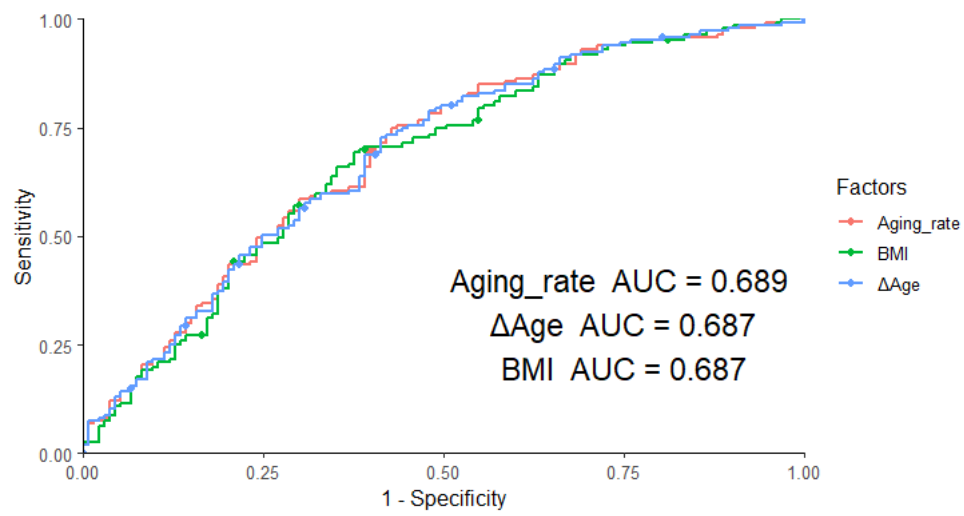

Figure S2. Receiver operating characteristic (ROC) curve analysis for epigenetic age acceleration ( $\Delta$ Age and aging rate) and BMI to distinguish subjects with hypertension (N=280).
